# Supplementary material
Source: PubMed Central journal article supplement (PMC4294114)
Supplement: bph0171-4914-sd1.pdf [file bph0171-4914-sd1.pdf]

## Supporting Information

# PKC inhibition results in a $K_v1.5+K_v\beta1.3$ pharmacology closer to $K_v1.5$ channels

A Macías<sup>1</sup>, A de la Cruz<sup>1</sup>, A Prieto<sup>1</sup>, DA Peraza<sup>1</sup>,  
MM Tamkun<sup>2</sup>, T González<sup>1</sup>, C Valenzuela<sup>1</sup>

<sup>1</sup>Instituto de Investigaciones Biomédicas ‘Alberto Sols’ (CSIC-UAM),  
Arturo Duperier 4, 28029 Madrid

<sup>2</sup>Program in Molecular, Cellular, and Integrative Neuroscience,  
Dept. of Biomedical Sciences & Dept. of Biochemistry and Molecular Biology, Colorado  
State University, Fort Collins, CO, USA

**Running title:**  *$K_v1.5+K_v\beta1.3$  pharmacology and PKC*

### Address for correspondence:

Carmen Valenzuela, Ph.D.

Instituto de Investigaciones Biomédicas ‘Alberto Sols’ (CSIC-UAM)

Arturo Duperier 4

28029 Madrid, SPAIN

Phone: +34915854493

Fax: +34915854401

E-mail: [cvalenzuela@iib.uam.es](mailto:cvalenzuela@iib.uam.es)

## SUPPLEMENTAL TABLES

**SUPPLEMENTAL TABLE 1:** IC<sub>50</sub> and n<sub>H</sub> from the of the concentration-response curves to bupivacaine in K<sub>v</sub>1.5+K<sub>v</sub>β1.3 channels expressed in cells treated with hispidin and bisindolylmaleimide II in comparison with those obtained of bupivacaine on K<sub>v</sub>1.5 and K<sub>v</sub>1.5+K<sub>v</sub>β1.3 channels.

|                                                 | IC <sub>50</sub> (μM) | n <sub>H</sub> |
|-------------------------------------------------|-----------------------|----------------|
| K <sub>v</sub> 1.5                              | 13.1 ± 0.8*           | ---            |
| K <sub>v</sub> 1.5+K <sub>v</sub> β1.3 Control  | 47.5 ± 5.1*           | ---            |
| K <sub>v</sub> 1.5+K <sub>v</sub> β1.3 Bis II   | 12.4 ± 1.8            | 0.88 ± 0.09    |
| K <sub>v</sub> 1.5+K <sub>v</sub> β1.3 Hispidin | 27.3 ± 1.3            | 1.23 ± 0.10    |

\*: Taken from (Gonzalez *et al.*, 2002)

## REFERENCES

Gonzalez T, Navarro-Polanco R, Arias C, Caballero R, Moreno I, Delpon E, et al. (2002). Assembly with the K<sub>v</sub>β1.3 subunit modulates drug block of hK<sub>v</sub>1.5 channels. *Mol Pharmacol* 62: 1456-1463.

## FIGURE LEGENDS

**FIGURE S1: Concentration dependence of bupivacaine-induced blockade of hispidin-treated  $K_v1.5+K_v\beta1.3$  channels.** (A) The dashed and dotted lines represent the dose-response curves obtained for the bupivacaine-induced blockade of  $K_v1.5$  and  $K_v1.5+K_v\beta1.3$  channels, respectively (taken from González et al., 2002). Reduction in the current (relative to the control) at the end of depolarising steps from -80 to +60 mV was used as an index of blockade. (●): Concentration-response curves for bupivacaine in bisindolylmaleimide II-treated  $K_v1.5+K_v\beta1.3$  channels and in hispidin-treated  $K_v1.5+K_v\beta1.3$  channels (○). (B) Reduction in the current (relative to the control) at 50 ms (○) and at 250 ms (●) depolarising steps from -80 to +60 mV. Each point represents the mean±S.E.M. of three to four experiments. The lines represent the fit of the experimental data to a monophasic Hill equation.

**FIGURE S2: Concentration dependence of bupivacaine- (A) and quinidine-induced (B) blockade of calphostin C-treated  $K_v1.5+K_v\beta1.3$  channels.** The dashed and continuous lines represent the dose-response curves obtained for the bupivacaine- or quinidine-induced blockade at 50 ms (○) and at 250 ms (●) depolarising steps from -80 to +60 mV, respectively. Each point represents the mean±S.E.M. of three to eight experiments. The continuous line represents the fit of the experimental data to a biphasic Hill equation.

**FIGURE S3: Concentration dependence of bupivacaine- (A) and quinidine-induced (B) blockade of bisindolylmaleimide II-treated  $K_v1.5+K_v\beta1.3$  channels.** The dashed and continuous lines represent the dose-response curves obtained for the bupivacaine- or quinidine-induced blockade at 50 ms (○) and at 250 ms (●) depolarising steps from -80 to +60 mV, respectively. Each point represents the mean±S.E.M. of three to eight experiments. The continuous line represents the fit of the experimental data to a monophasic Hill equation.

**FIGURE S4: Absolute values for bupivacaine- and quinidine- blockade of calphostin C- and bisindolylmaleimide II-treated  $K_v1.5+K_v\beta1.3$  channels.** Magnitude of calphostin C- $K_v1.5+K_v\beta1.3$  currents in the absence and in the presence of different bupivacaine (A) and quinidine (B) concentrations. Magnitude of bisindolylmaleimide II- $K_v1.5+K_v\beta1.3$  currents in the absence and in the presence of different bupivacaine (C) and quinidine (D) concentrations. Each point represents the mean±S.E.M. of three to eight experiments.

**A**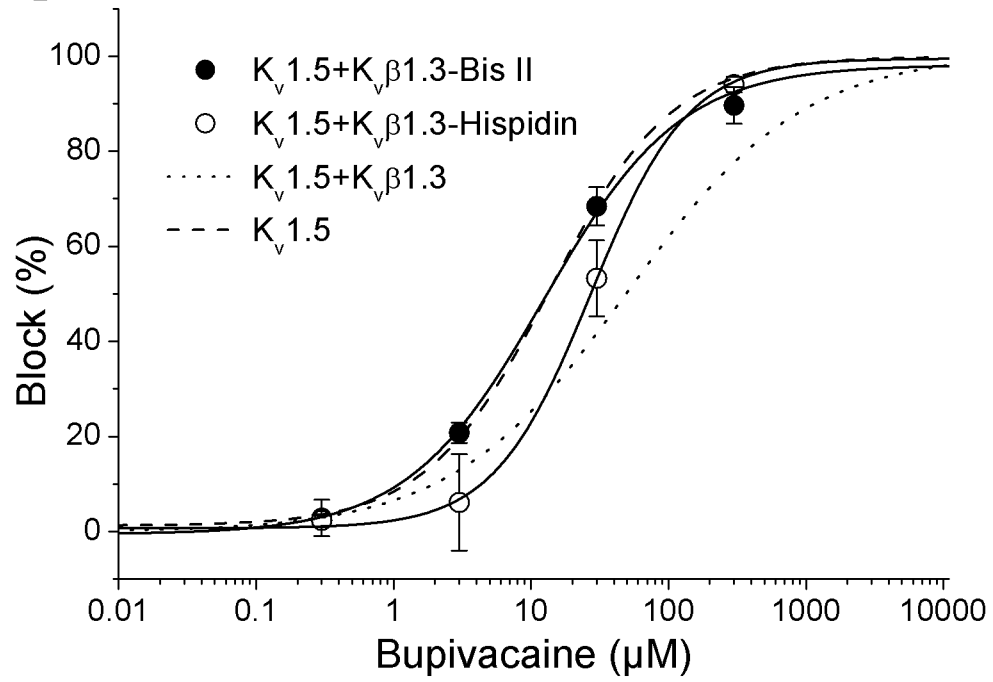**B**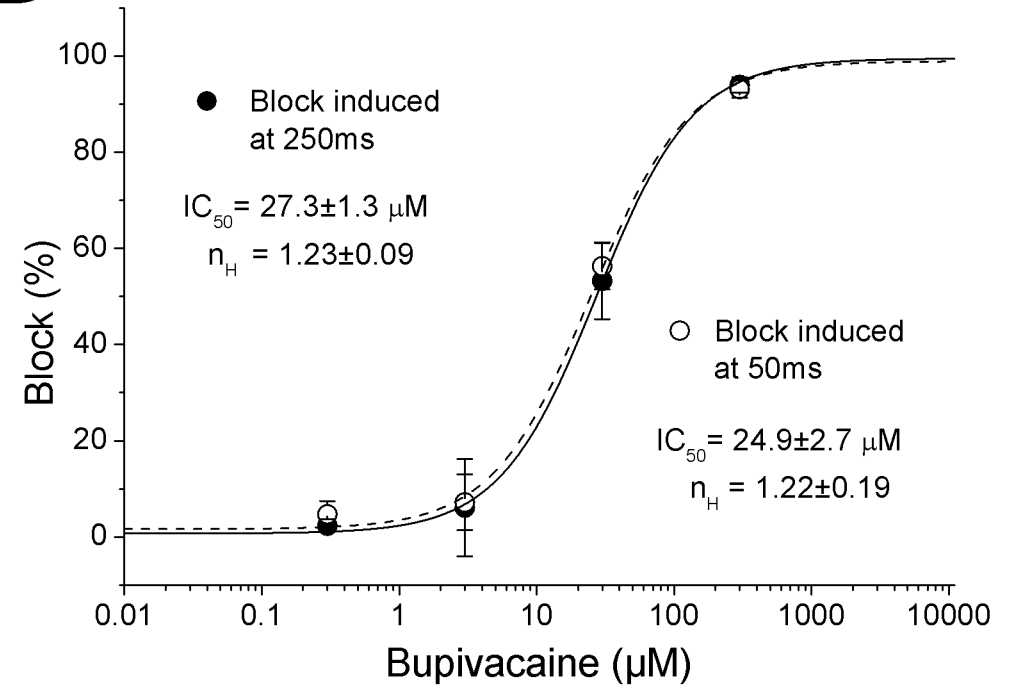

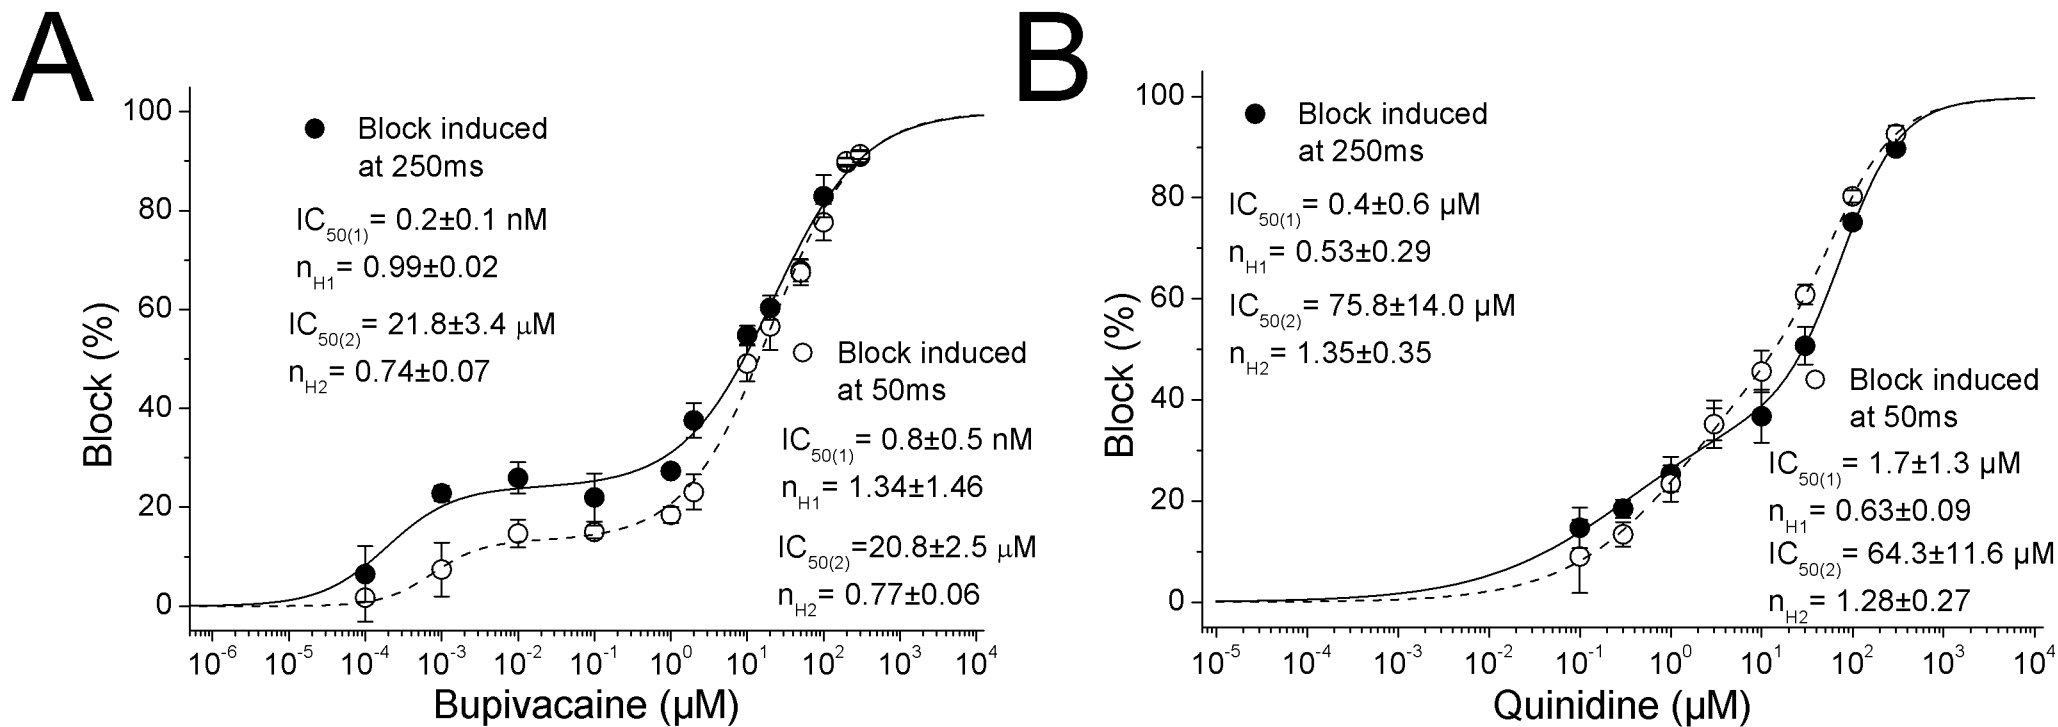

Figure S2

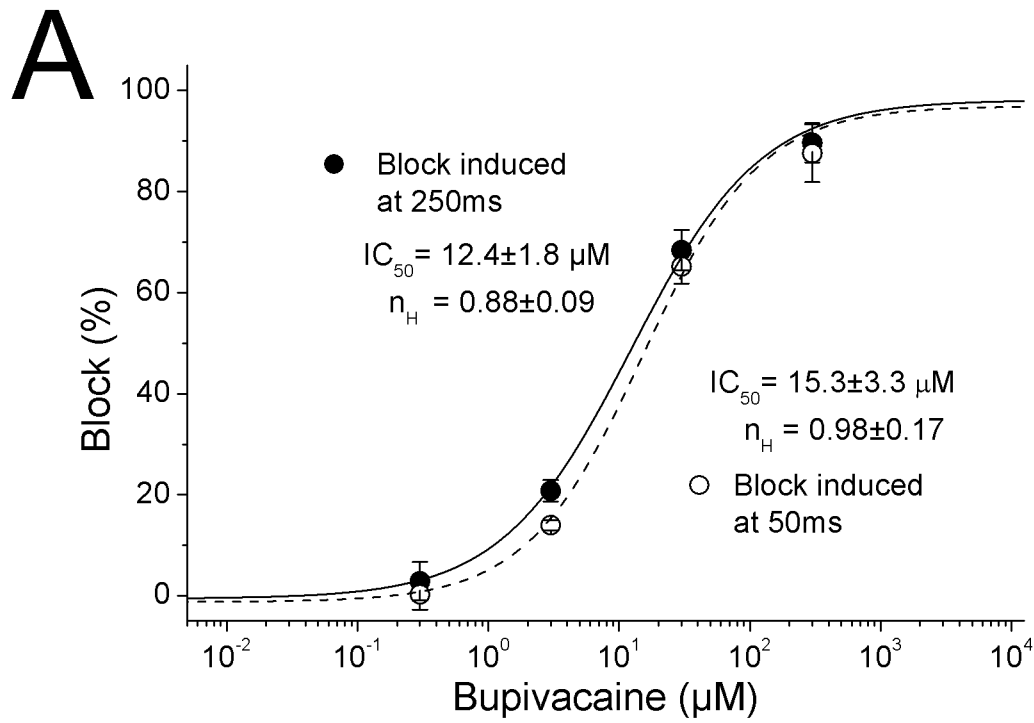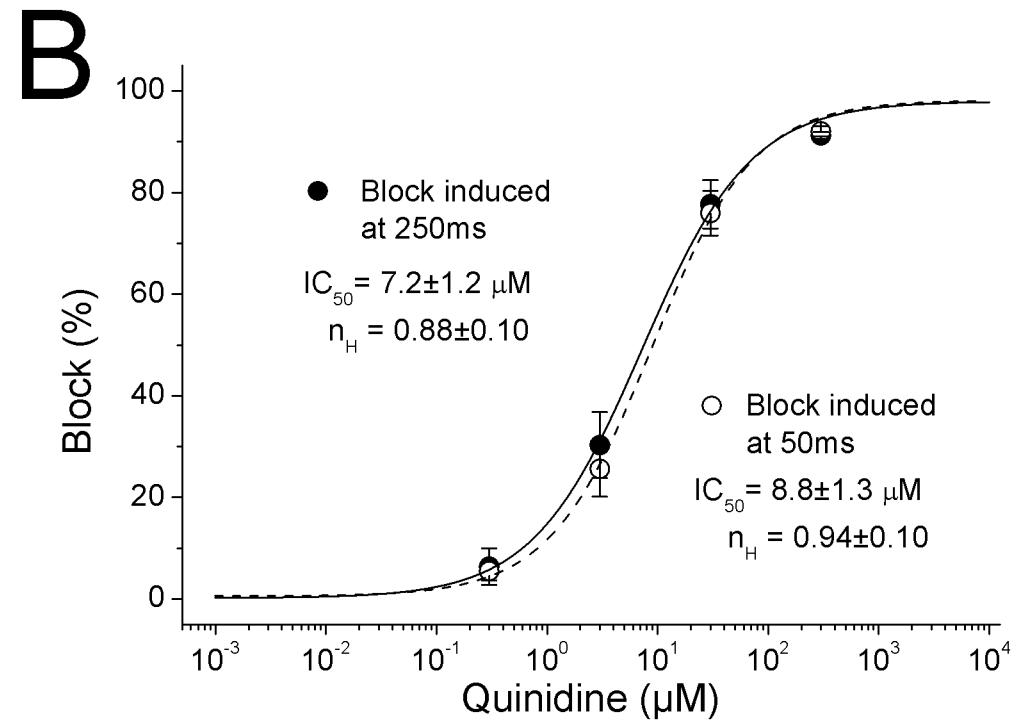

Figure S3

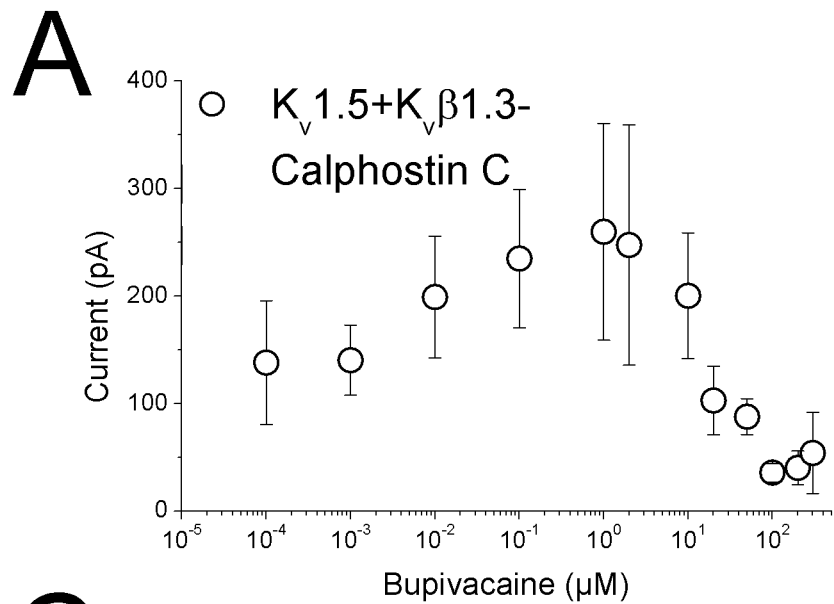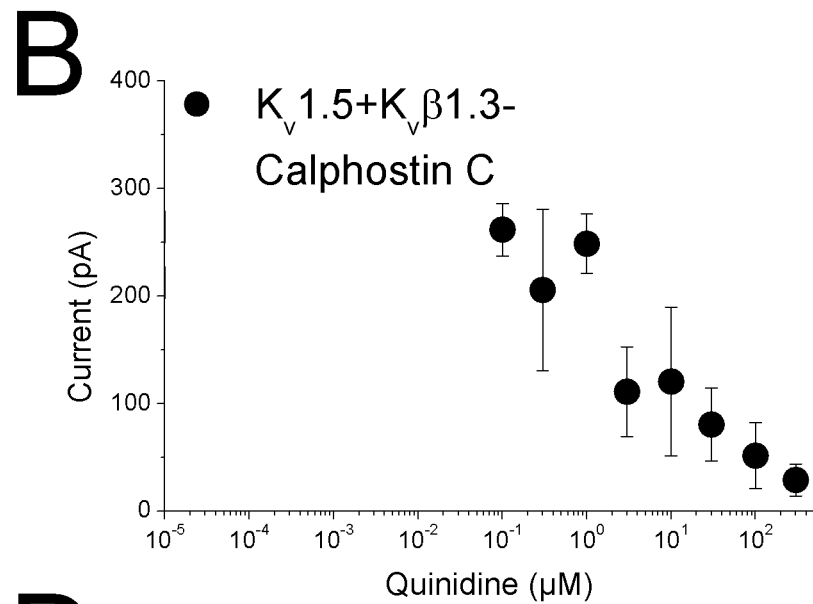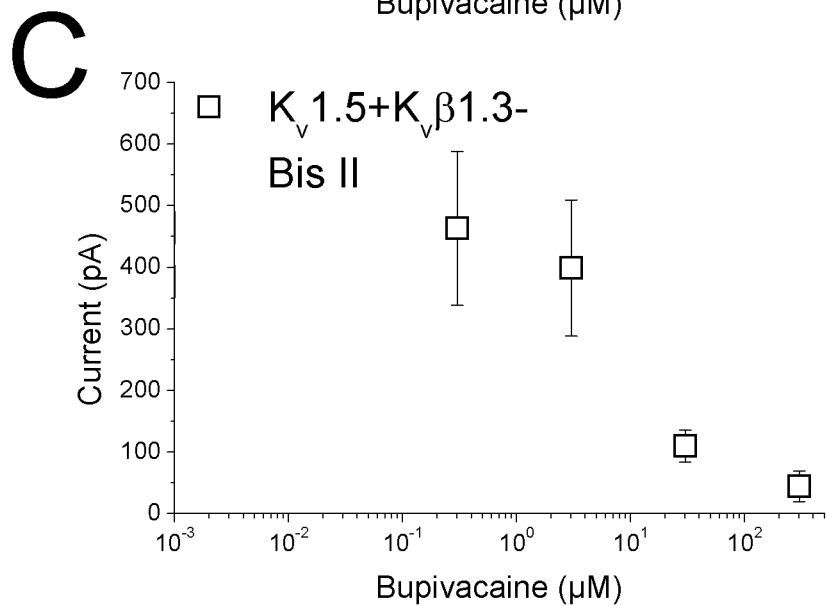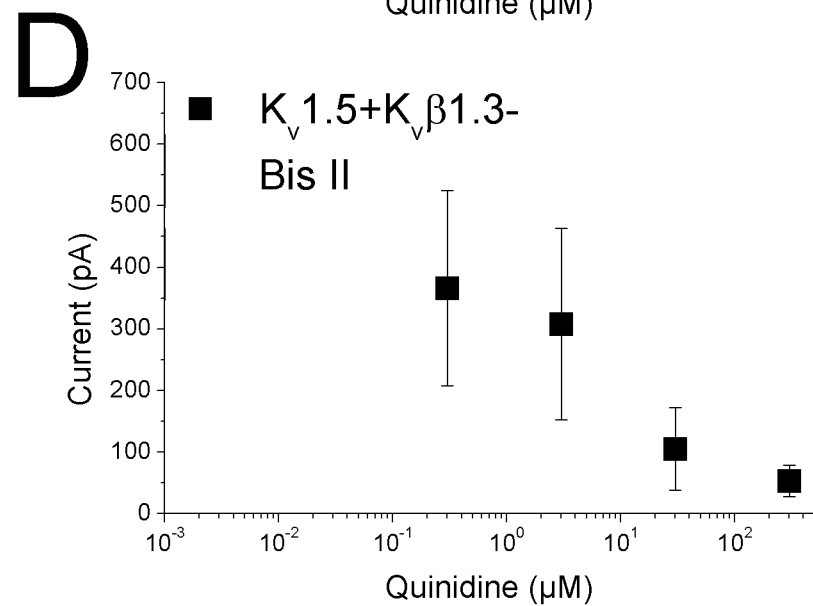

Figure S4
